# Supplementary material for: Preclinical evaluation of combination nemtabrutinib and venetoclax in chronic lymphocytic leukemia
Source: PubMed Central journal article supplement (PMC9664697; doi:10.1186/s13045-022-01386-1), 2022-11-15

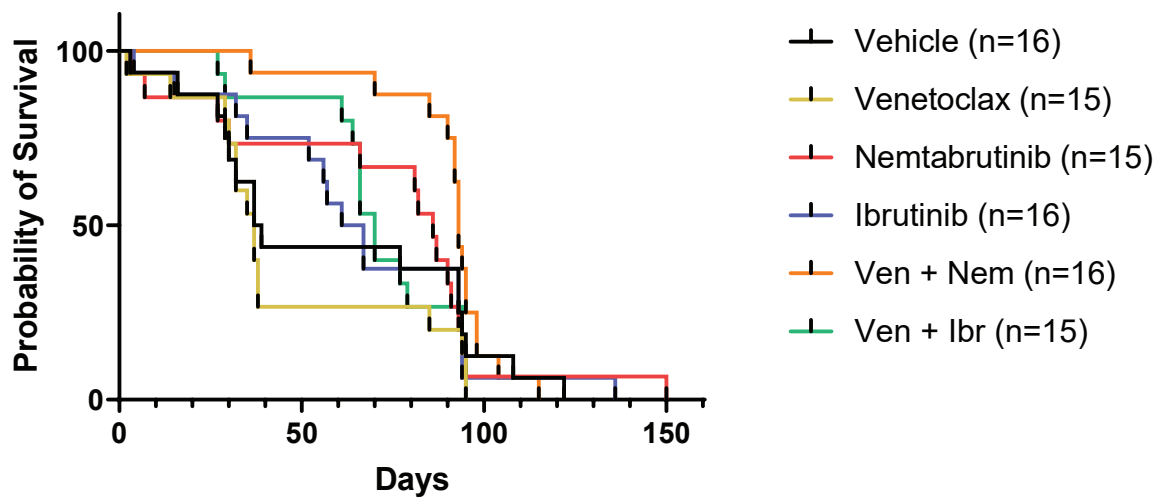

Supplement: 13045_2022_1386_MOESM1_ESM.pdf [file 13045_2022_1386_MOESM1_ESM.pdf]
